# Supplementary material
Source: publisher site journal article supplement (https://www.spandidos-publications.com/7672/downloadSupplementary)
Supplement: Supplementary file 1 [file downloadSupplementary]

Table SI. Sensitivity analyses of between-group differences in MMSE endpoint under alternative models.

| Analysis model                       | Group difference (P-value) | Cohen's d | 95% CI    |
|--------------------------------------|----------------------------|-----------|-----------|
| Adjusting for baseline value and age | 0.046                      | 0.72      | 0.12-2.18 |
| No covariates                        | 0.034                      | -         | -         |
| Adjusting for age and sex            | 0.040                      | -         | -         |

Cohen's d reported for the primary model only.

Table SII. Exploratory sensitivity analyses and corresponding effect sizes for secondary outcomes at 12 months

| Outcome measure | Between-group P (ANCOVA) | Cohen's d | Sensitivity (alt. model) P |
|-----------------|--------------------------|-----------|----------------------------|
| HDS-R           | 0.308                    | 0.38      | 0.105                      |
| FAB             | 0.634                    | 0.28      | 0.622                      |
| CADi total      | 0.038                    | 0.75      | 0.122                      |
| CADi time       | 0.008                    | 1.02      | 0.016                      |
| Apathy          | 0.008                    | 0.89      | 0.014                      |
| SDS             | 0.142                    | 0.32      | 0.211                      |

ANCOVA adjusted for age and baseline score unless otherwise noted. Alternative model adjusted for age and sex. CADi, Cognitive Assessment for Dementia, iPad version; SDS, Self-rating Depression Scale; FAB, Frontal Assessment Battery; HDS-R, Revised Hasegawa's Dementia Scale.

Table SIII. Partial correlation coefficients between cognitive, emotional and bone-related outcomes at 12 months.

| Variable 1                 | Variable 2 | Partial r | P-value |
|----------------------------|------------|-----------|---------|
| MMSE                       | Apathy     | -0.513    | 0.001   |
| MMSE                       | SDS        | -0.472    | 0.002   |
| SDS                        | Apathy     | 0.769     | <0.0001 |
| CADi time                  | % YAM      | -0.283    | 0.046   |
| CADi total                 | % YAM      | 0.369     | 0.021   |
| SDS                        | % YAM      | -0.439    | 0.005   |
| Apathy                     | % YAM      | -0.331    | 0.039   |
| MMSE 'Recall 3 words'      | Apathy     | -0.499    | <0.001  |
| CADi 'Delayed recognition' | Apathy     | 0.372     | 0.019   |

Partial correlations were calculated using data from the 12-month assessment, adjusting for age and baseline scores. The table presents r-values and corresponding P-values for selected outcome variables. All correlations were tested two-tailed, and statistically significant results are shown. MMSE, Mini-Mental State Examination; CADi, Cognitive Assessment for Dementia, iPad version; SDS, Self-rating Depression Scale; %YAM, percentage of the Young Adult Mean.
